# Supplementary material for: Microwave-assisted, ionic liquid-catalyzed aminolysis and alcoholysis of phosphinic derivatives: the interconversion of phosphinates and phosphinic amides
Source: Royal Society of Chemistry journal article supplement (doi:10.1039/d3gc02711b), 2023-01-01

## Supporting Information

### **Microwave-assisted, ionic liquid-catalyzed aminolysis and alcoholysis of phosphinic derivatives; The interconversion of phosphinates and phosphinic amides**

**György Keglevich,\* Sarolta Szilágyi and Nikoletta Harsági**

*Department of Organic Chemistry and Technology, Faculty of Chemical Technology and Biotechnology, Budapest University of Technology and Economics, 1521 Budapest, Hungary*

### **Contents**

<sup>31</sup>P, <sup>13</sup>C and <sup>1</sup>H spectra for the new compounds

# $^{31}\text{P}$ , $^{13}\text{C}$ and $^1\text{H}$ spectra for the new compounds

## *1-propylamino-3-methylphospholane oxide (6b)*

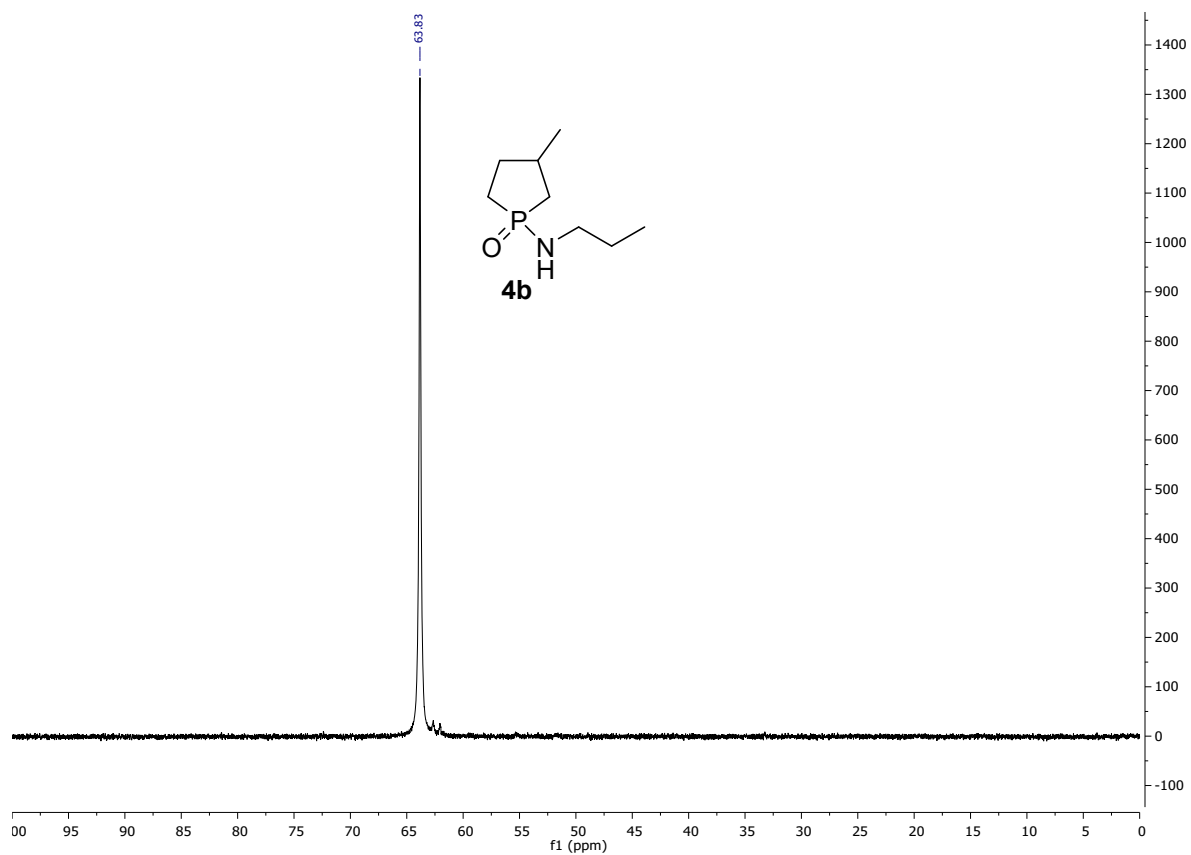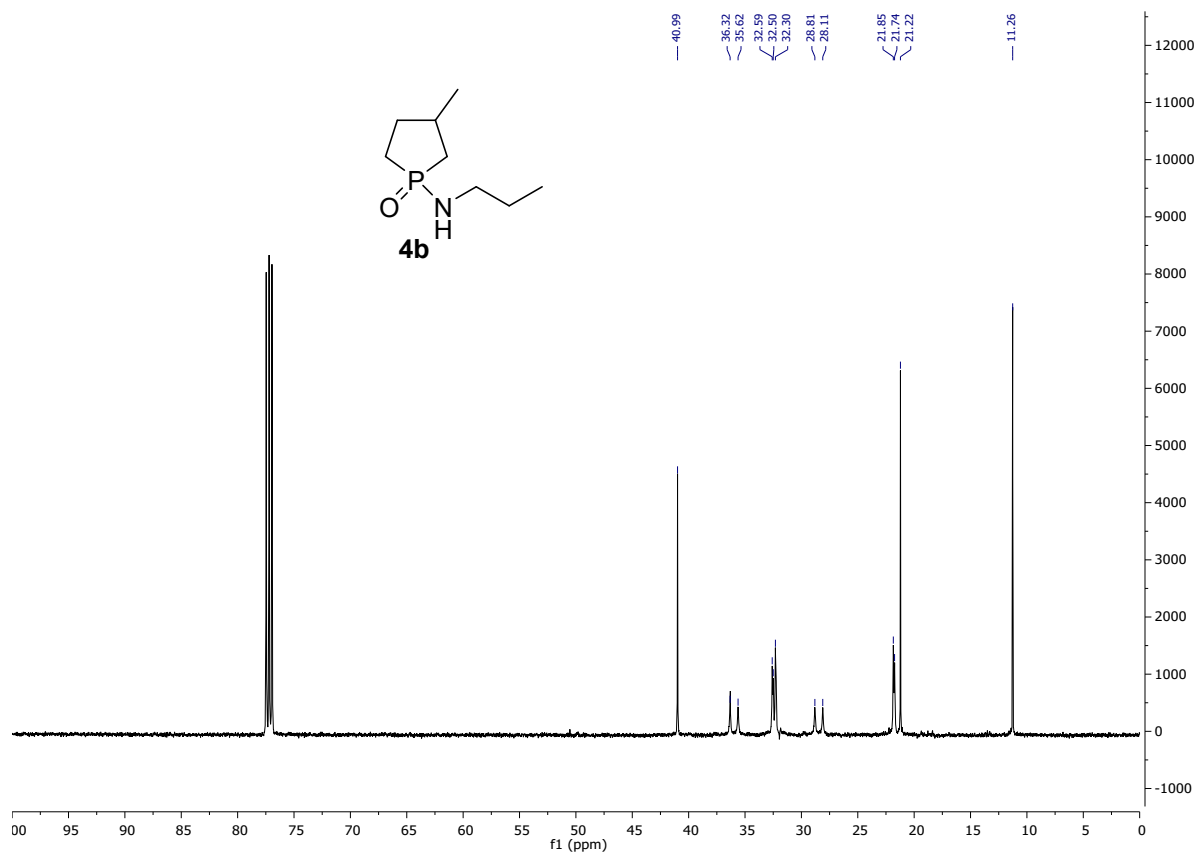

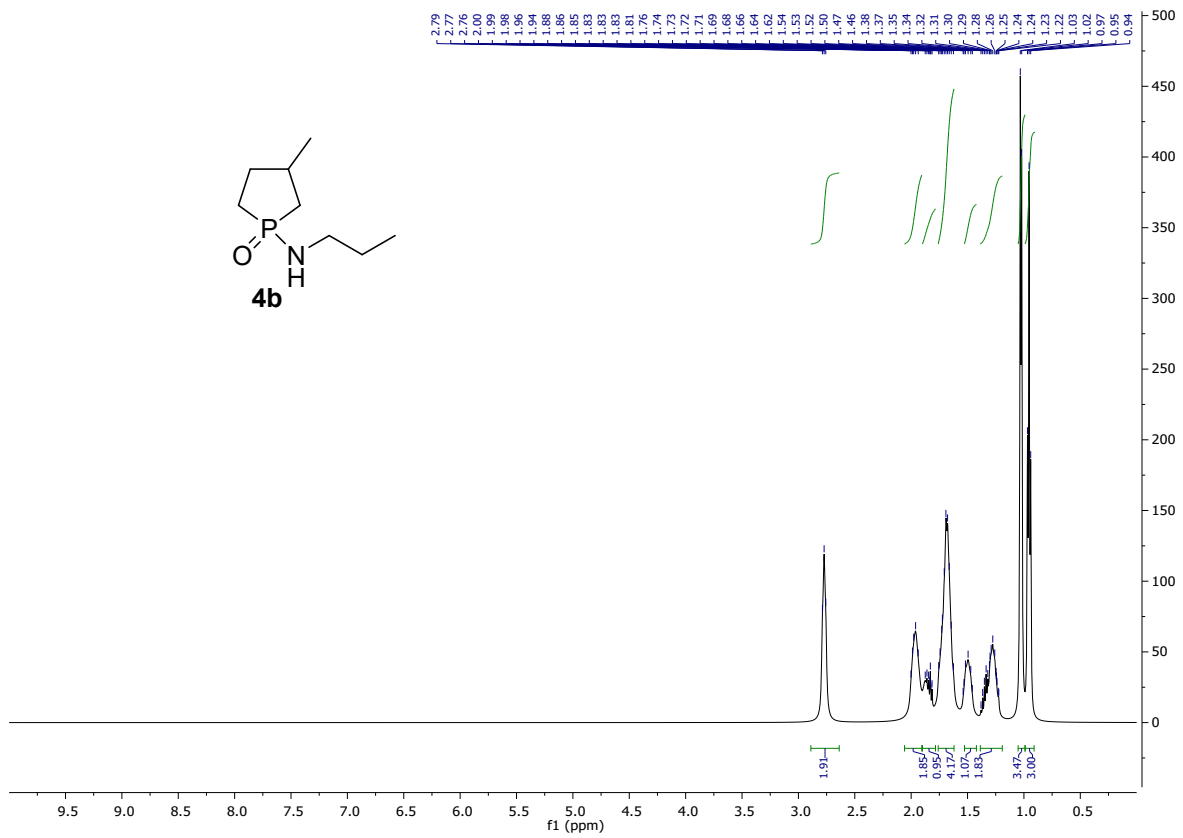

*1-butylamino-3-methylphospholane oxide (6c)*

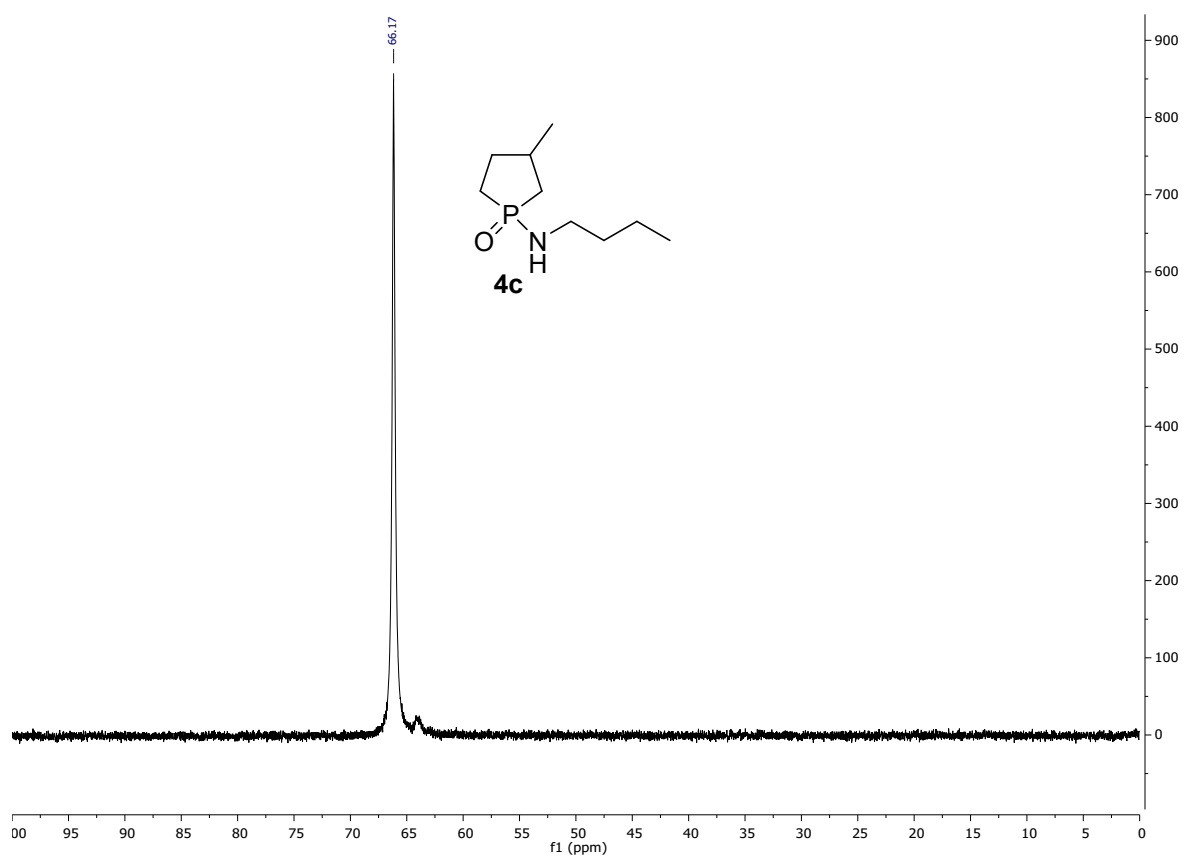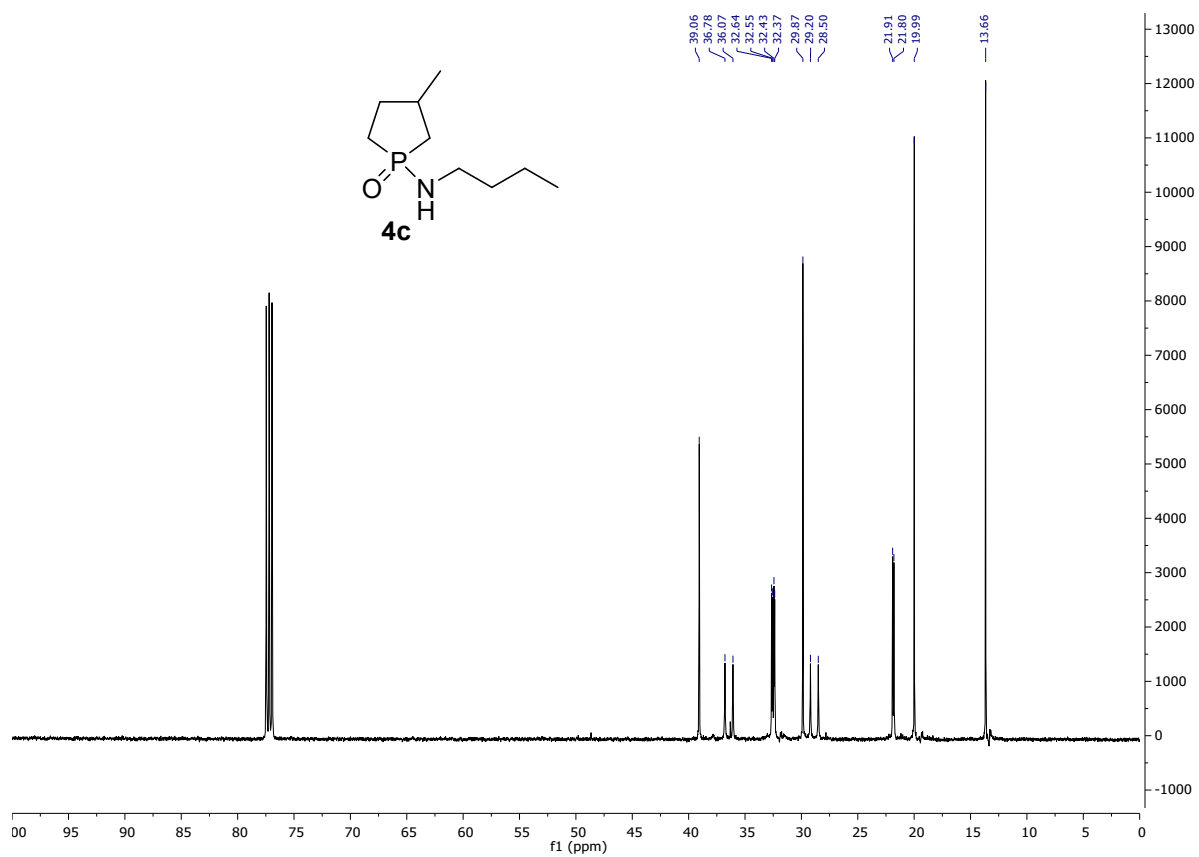

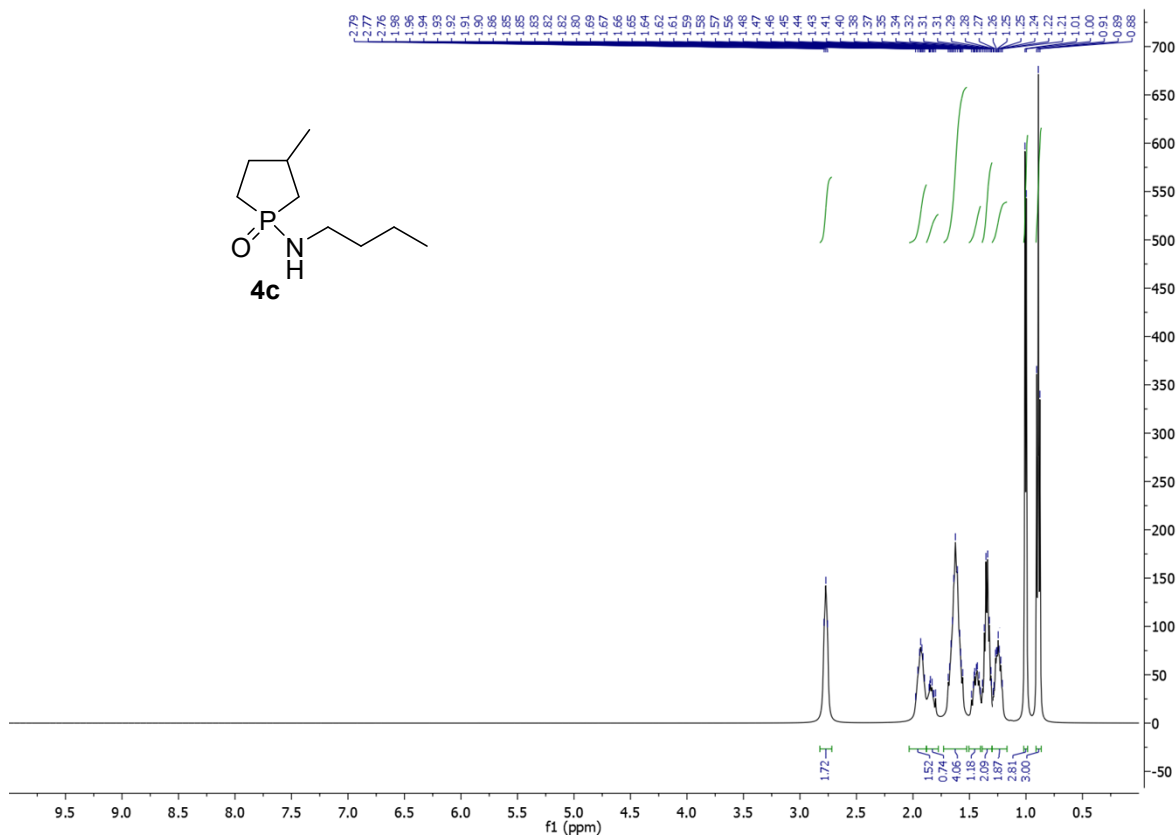

*1-isobutylamino-3-methylphospholane oxide (6d)*

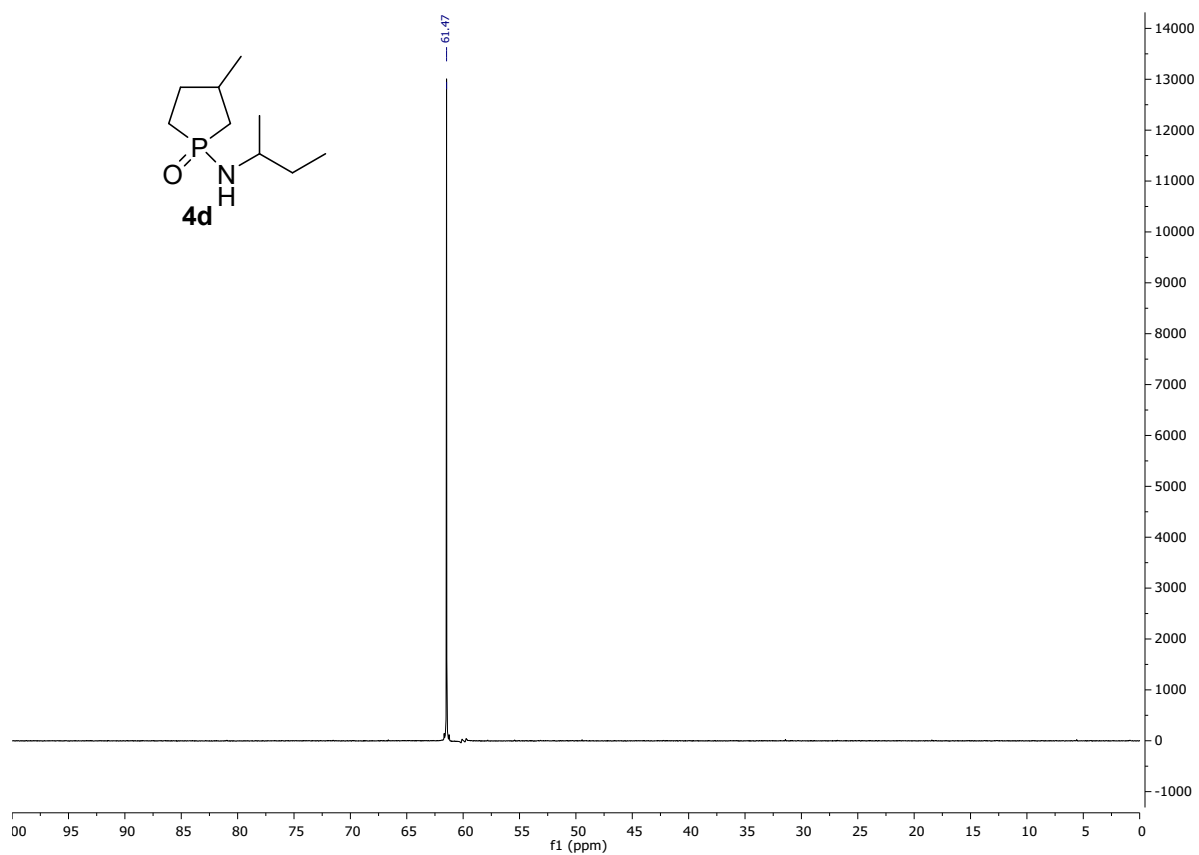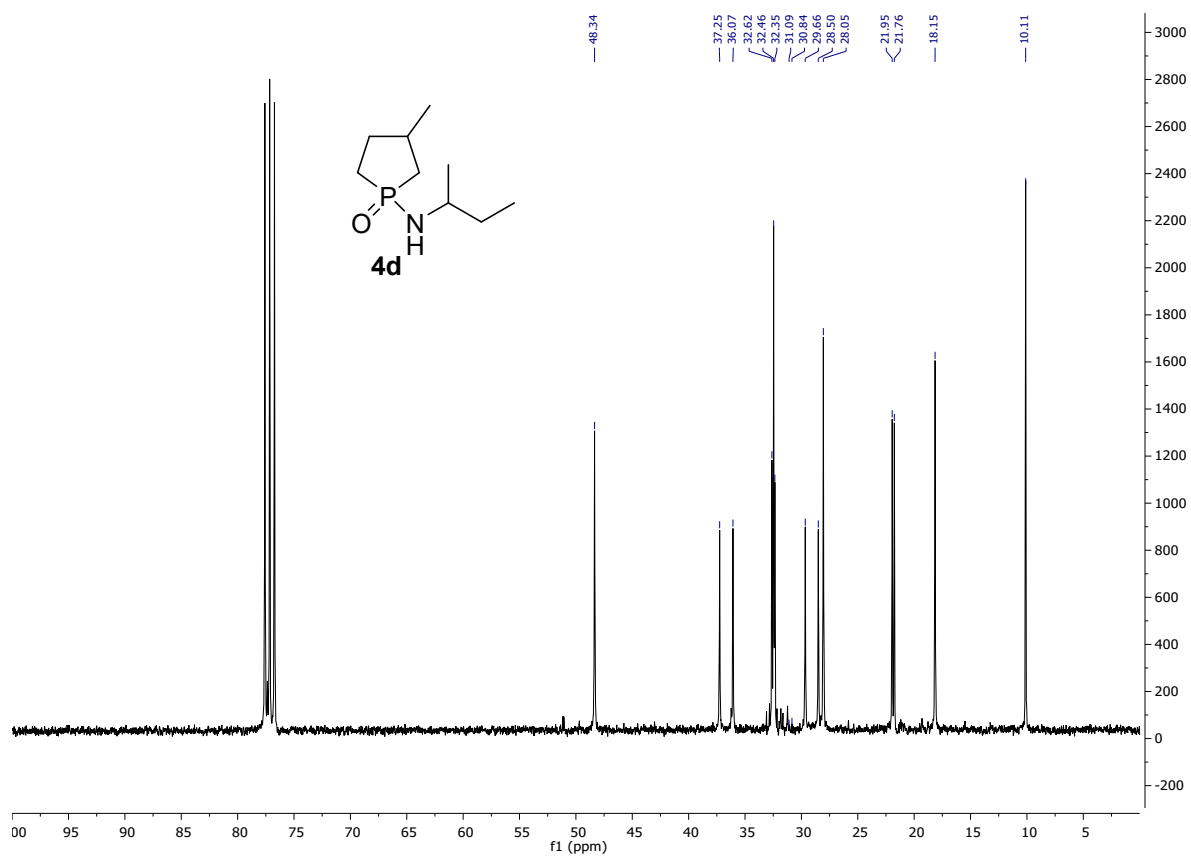

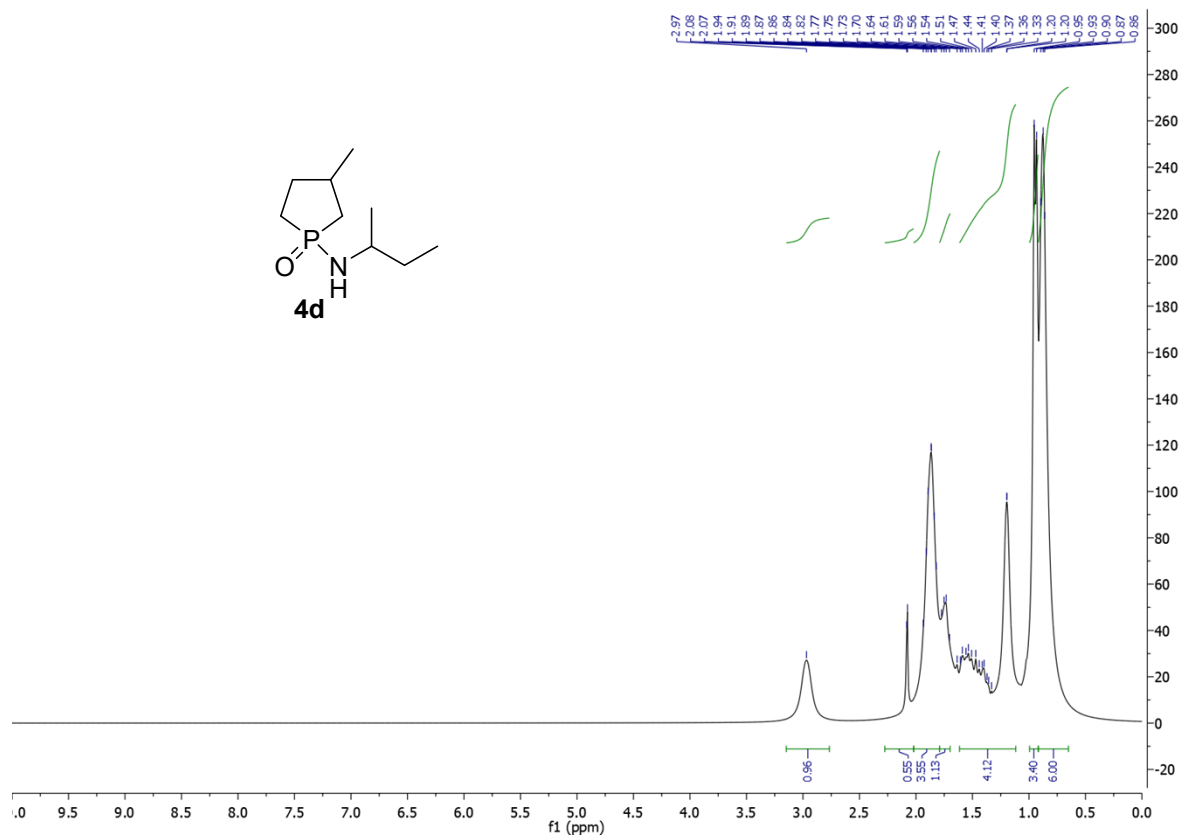

*1-phenylamino-3-methylphospholane oxide (6e)*

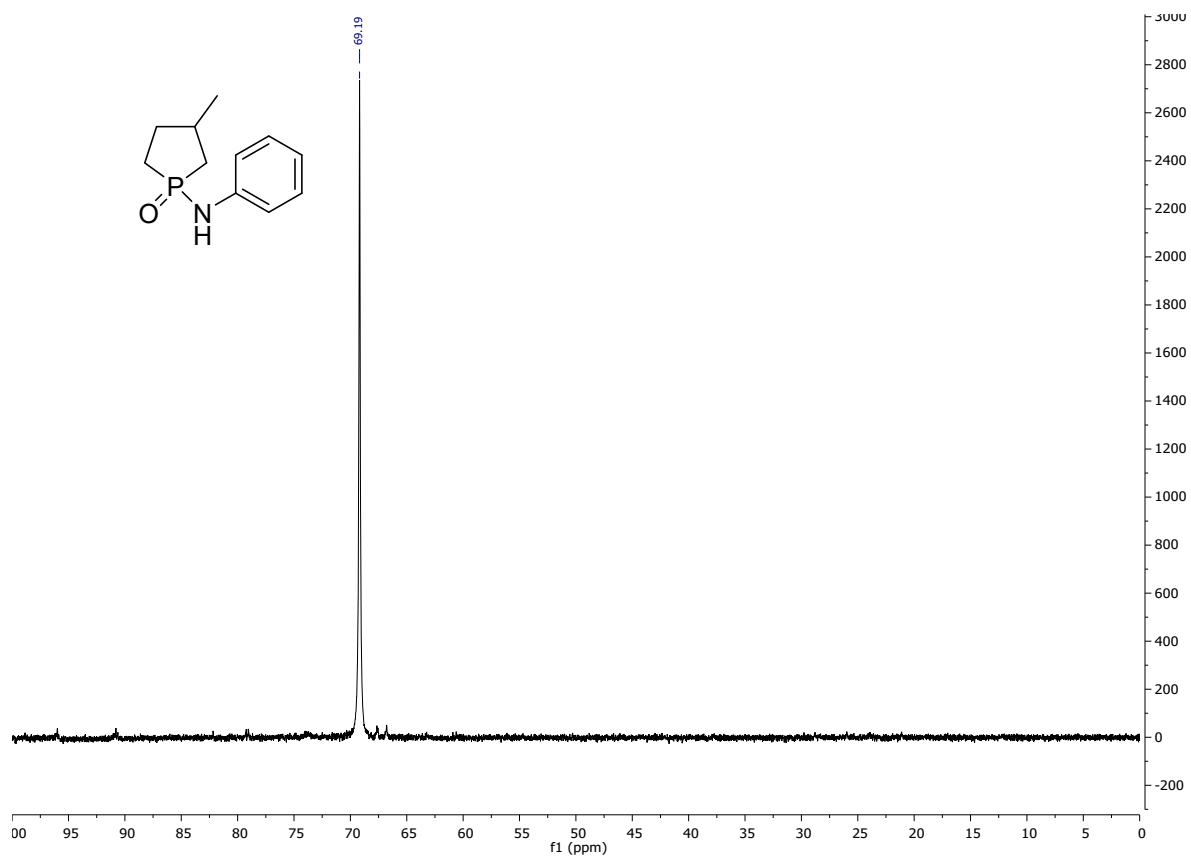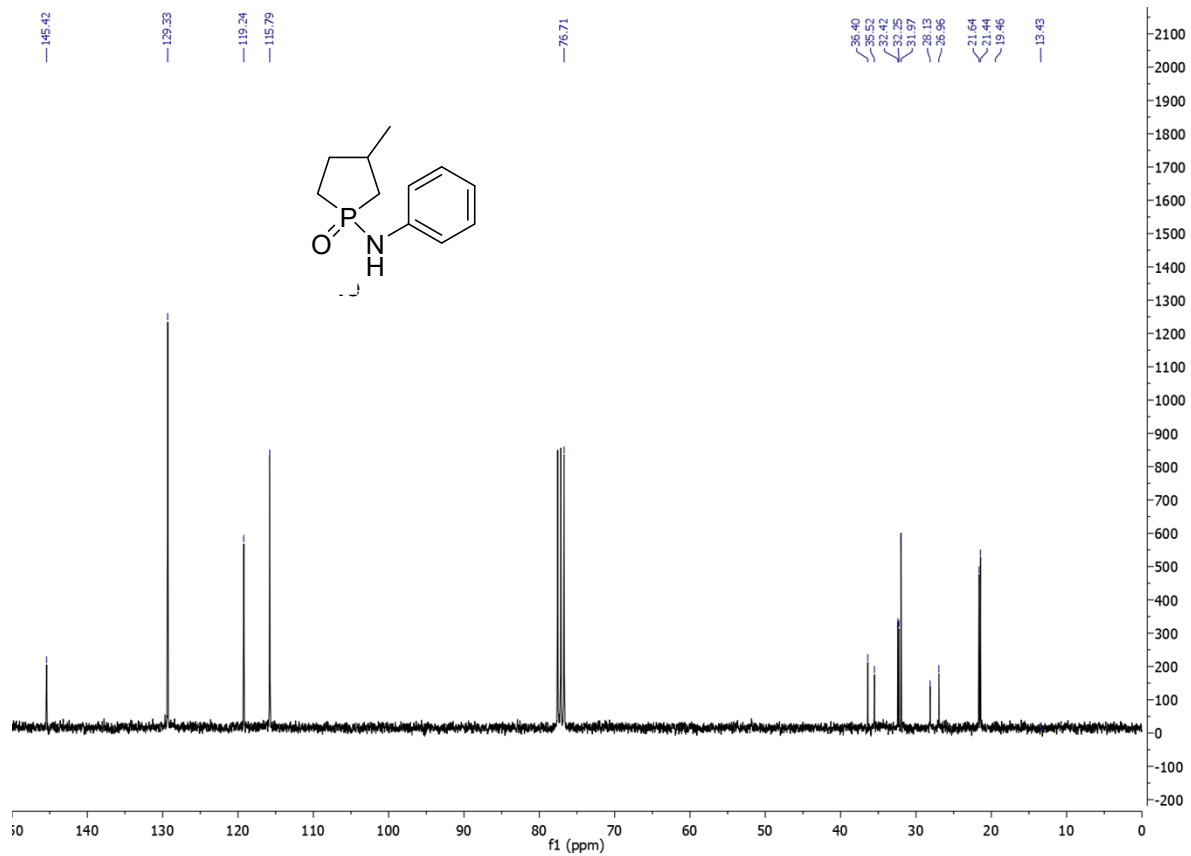



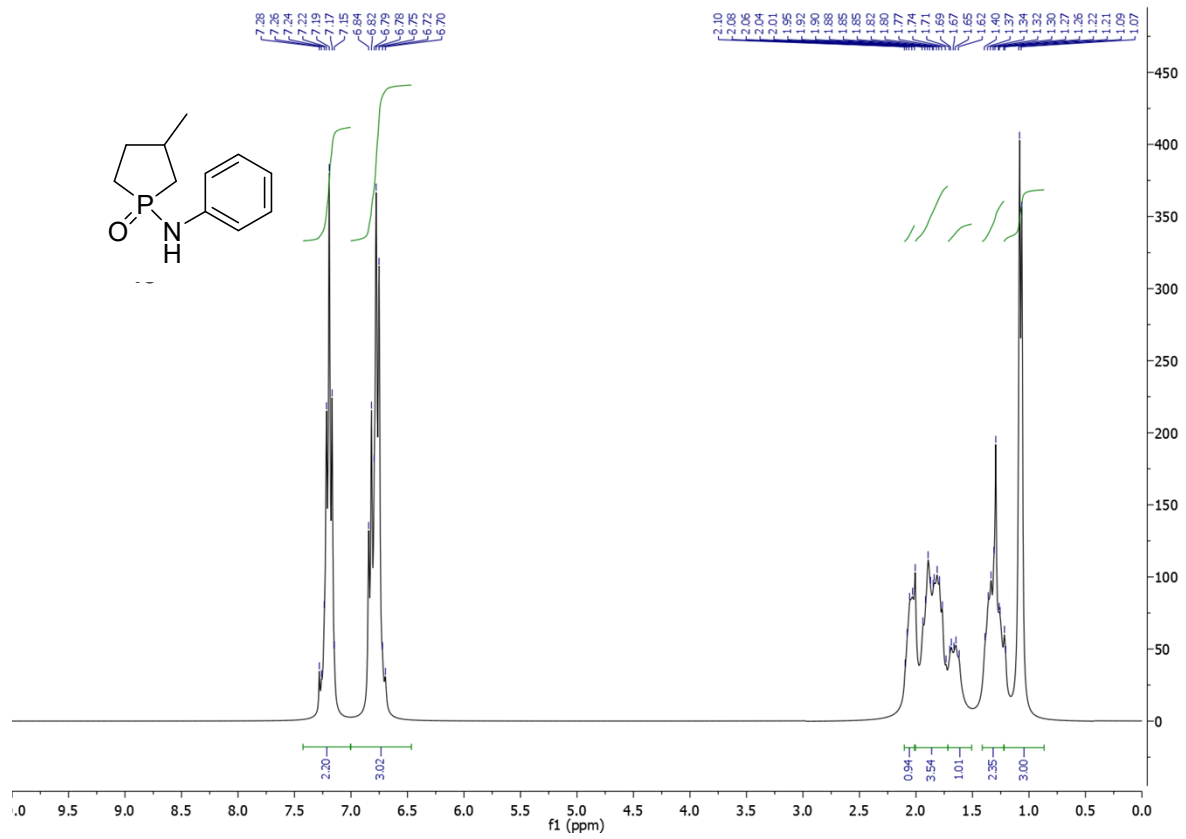

*1-butylamino-3,4-dimethylphospholane oxide (8c)*

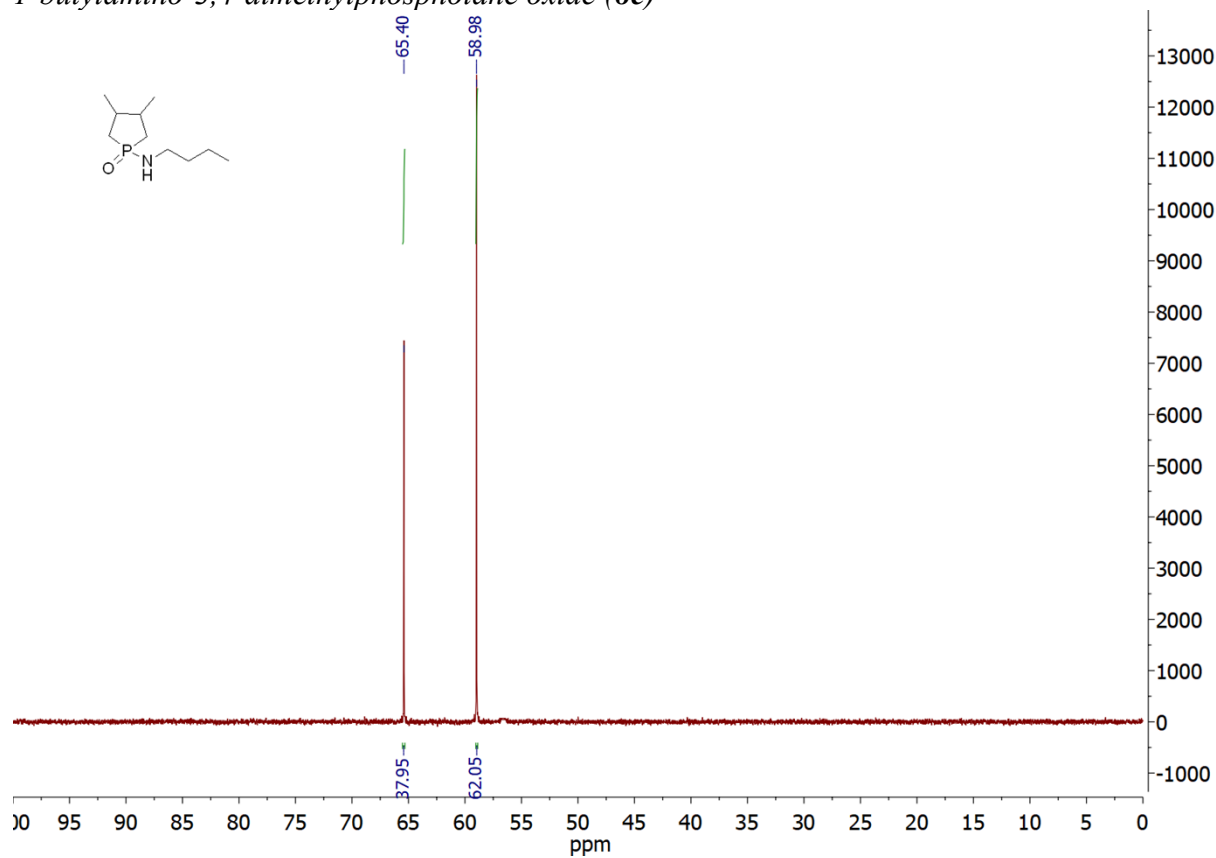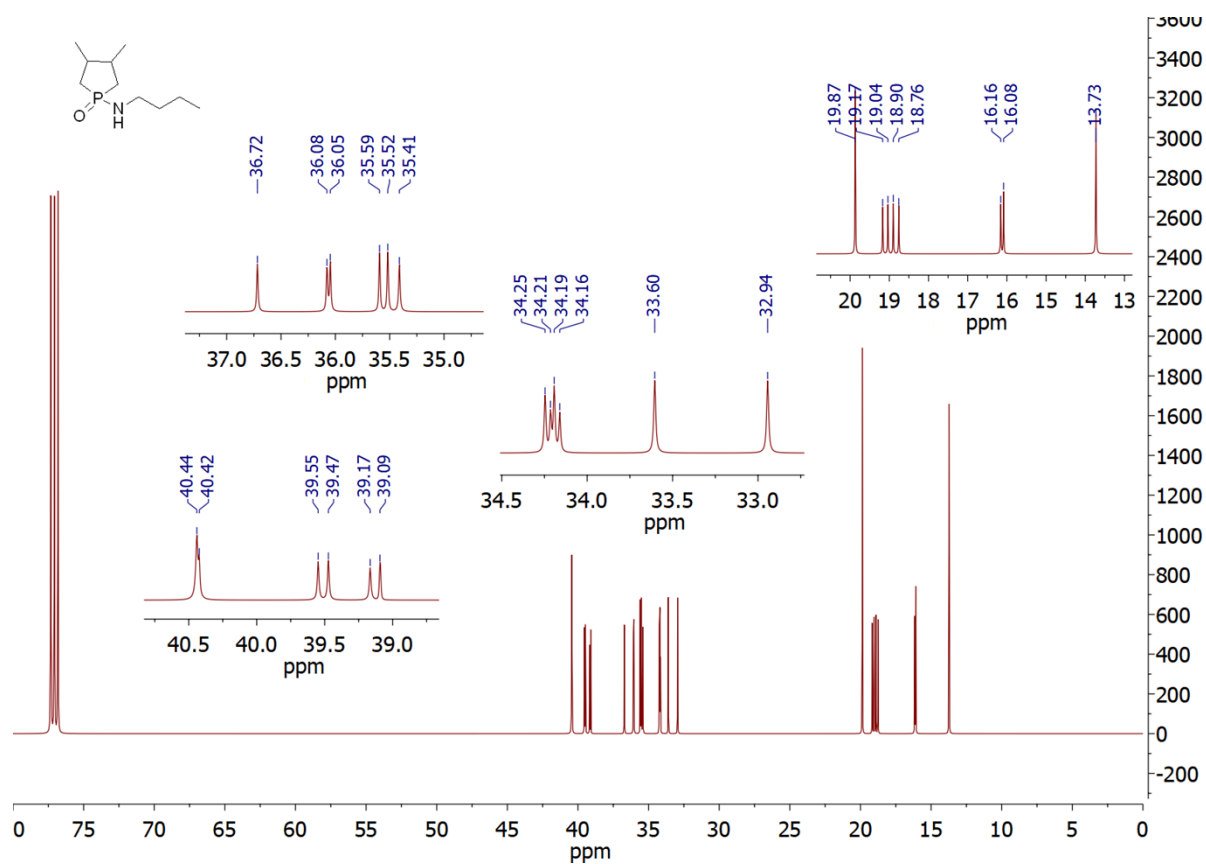

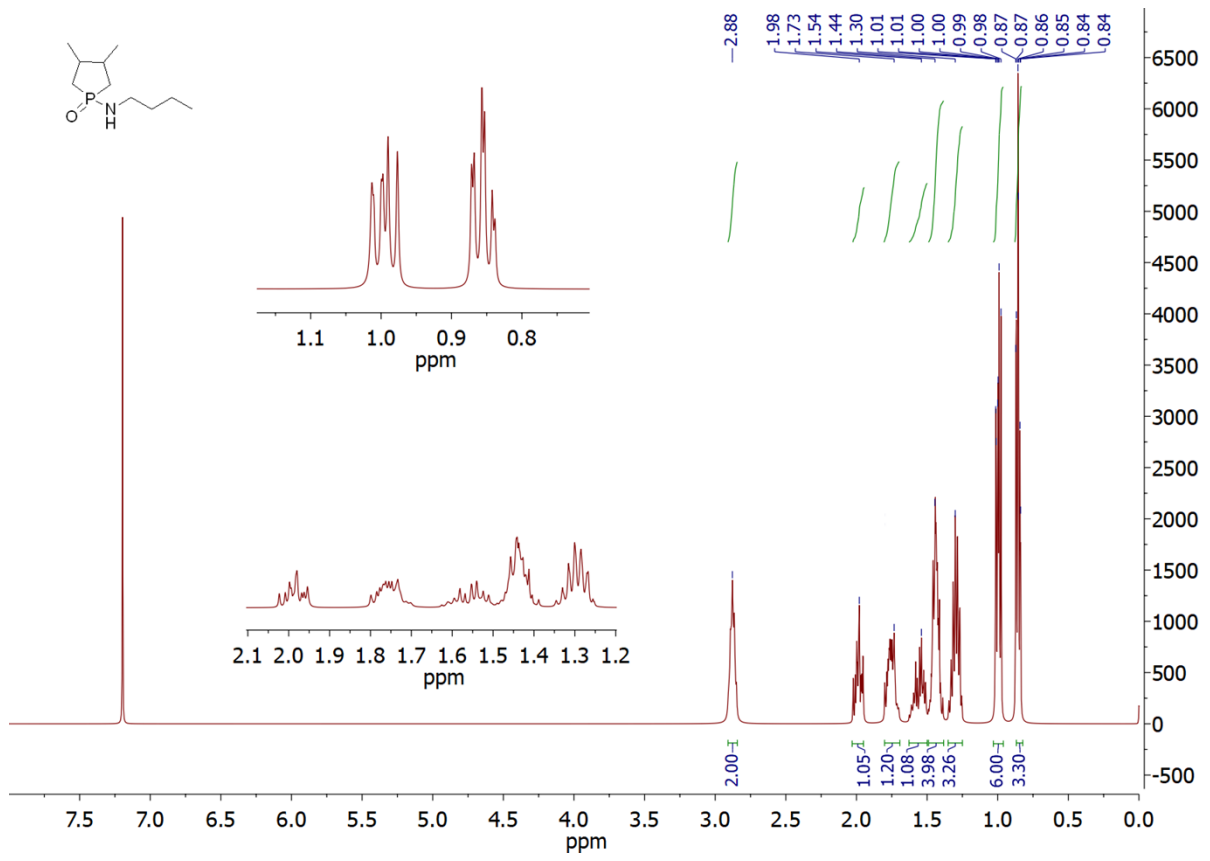

3-methyl-1-phenylamino-3-phospholene oxide (**2e**)

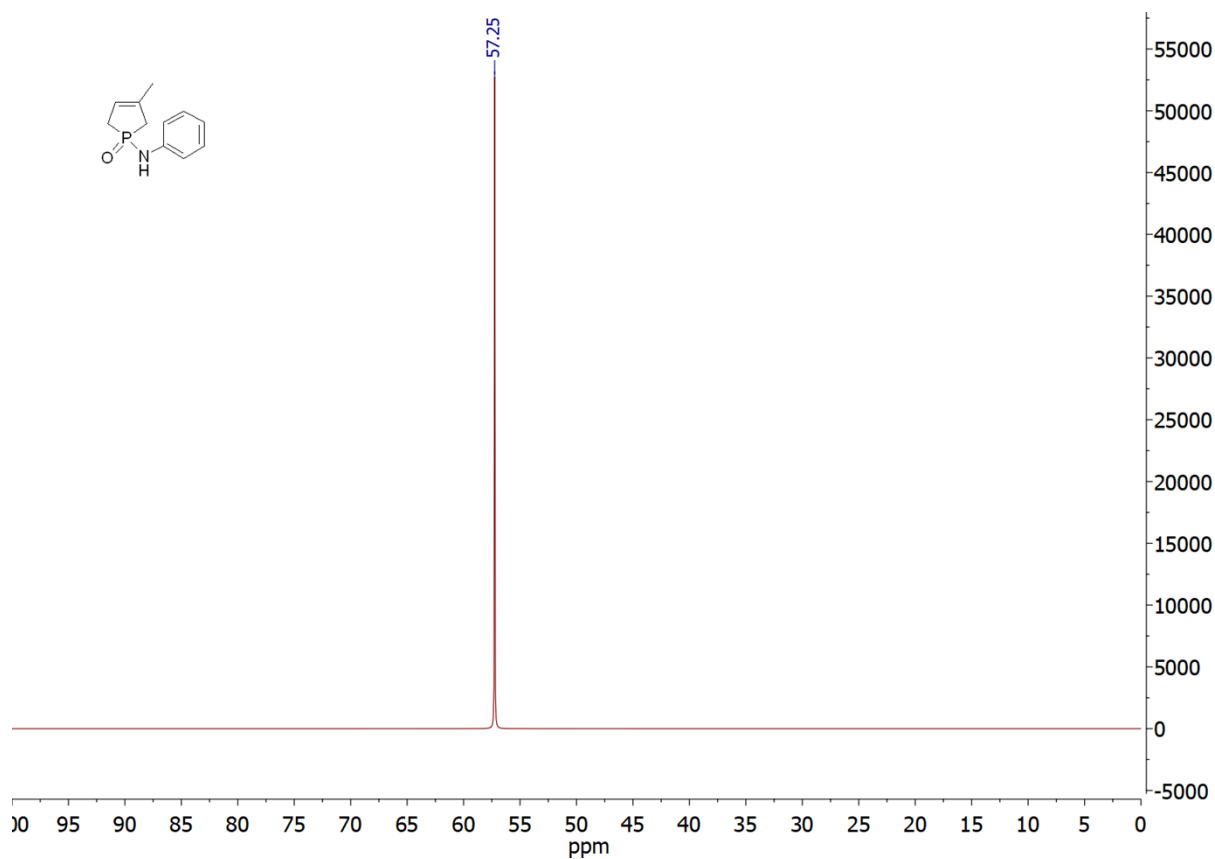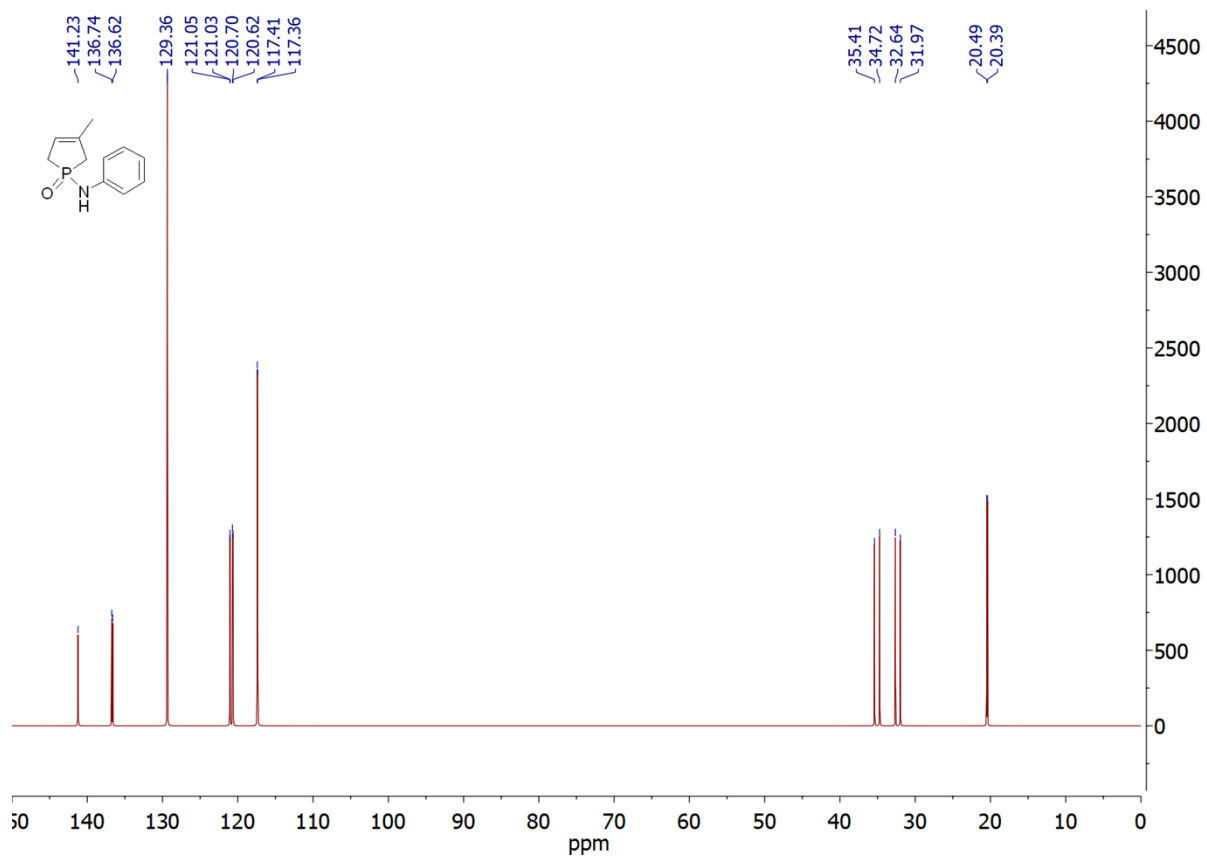

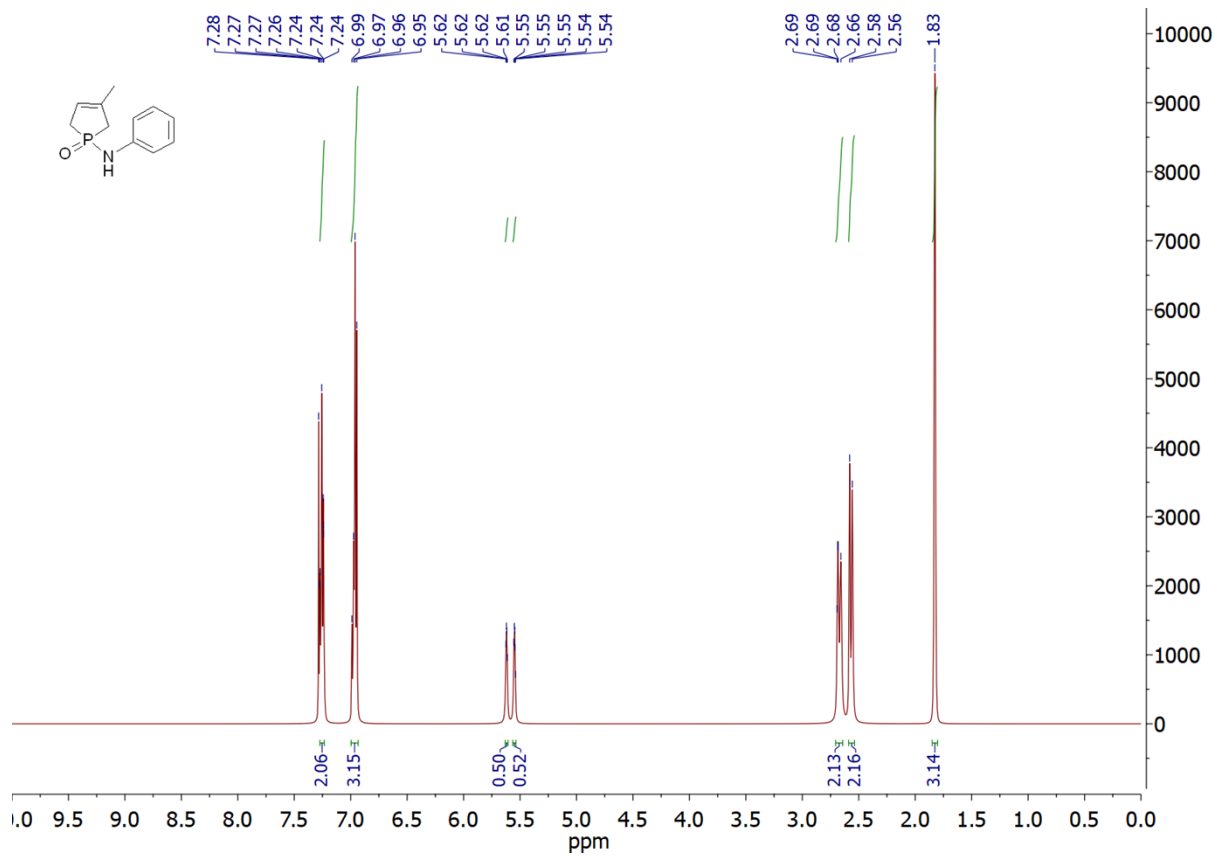

Supplement: d3gc02711b1.pdf [file d3gc02711b1.pdf]
